# Supplementary material for: Study on the preparation and n-heptane isomerization performance of MoOx-Pd/Ce-MCM-48 catalyst
Source: Royal Society of Chemistry journal article supplement (doi:10.1039/d3ra08454j), 2024-01-01
Supplement: d3ra08454j1.pdf [file d3ra08454j1.pdf]

## Supporting Information

### Study on the preparation and n-heptane isomerization performance of MoO<sub>x</sub>-Pd/Ce-MCM-48 catalyst

Yanhong Cui,<sup>ab</sup> Xiuli Dong,<sup>a</sup> Zhen Jiang,<sup>a</sup> Yanhua Suo,<sup>a</sup> Wei Zhang,<sup>a</sup> Yingjun Wang,<sup>✉a</sup>

<sup>a</sup>College of Chemistry and Chemical Engineering, Northeast Petroleum University, Daqing 163318, China. E-mail: 422536337@qq.com

<sup>b</sup>National Coarse Cereals Engineering Research Center, Heilongjiang Bayi Agricultural University/Quality Supervision, Inspection and Test Center of Agricultural and Processed Products(Daqing), Ministry of Agriculture and Rural Affairs. Daqing 163319, China.

✉Corresponding author: wacyh1999@163.com

#### Table of contents

#### 1. Supporting Figures

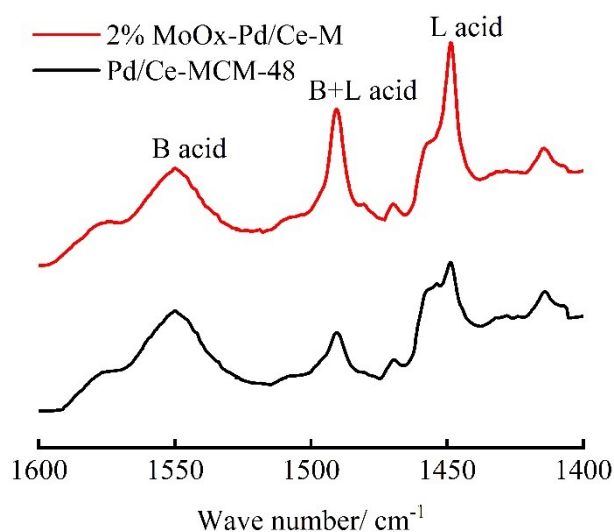

Figure S1. Py-IR spectra of Pd/Ce-MCM-48 and 2% MoO<sub>x</sub>-Pd/Ce-M catalyst samples
